# Supplementary material for: An extensive molecular cytogenetic characterization in high-risk chronic lymphocytic leukemia identifies karyotype aberrations and TP53 disruption as predictors of outcome and chemorefractoriness
Source: PubMed Central journal article supplement (PMC5438626; doi:10.18632/oncotarget.15883), 2017-03-03
Supplement: oncotarget-08-28008-s001.pdf [file oncotarget-08-28008-s001.pdf]

# An extensive molecular cytogenetic characterization in high-risk chronic lymphocytic leukemia identifies karyotype aberrations and *TP53* disruption as predictors of outcome and chemorefractoriness

## Supplementary Materials

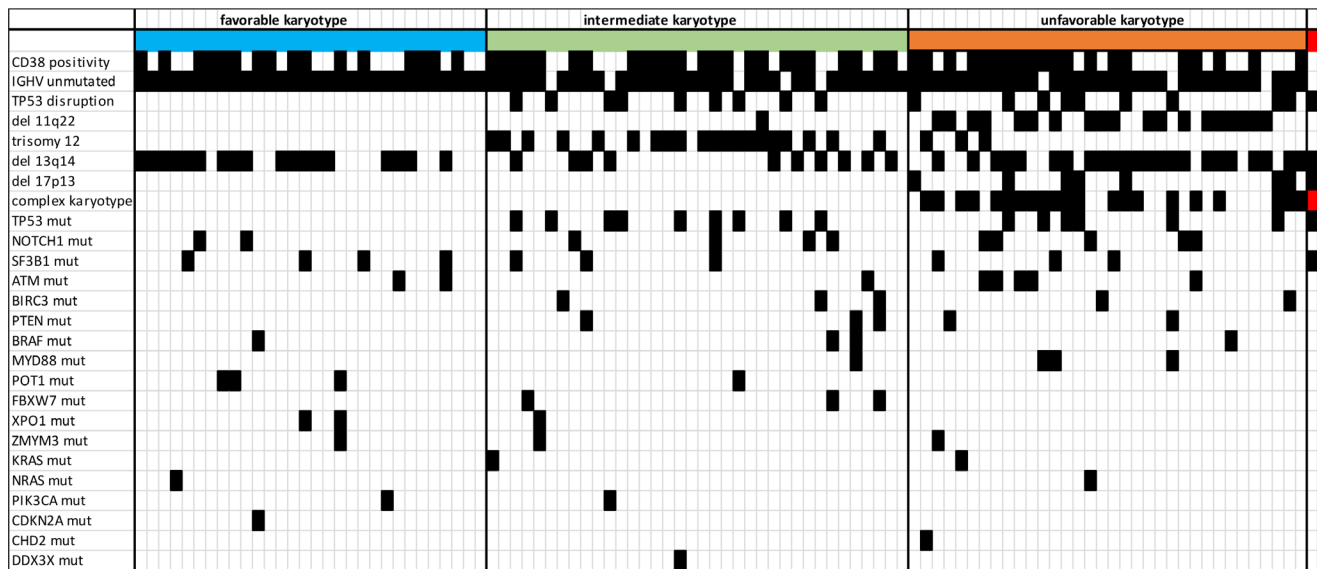

**Supplementary Figure 1: Clustering diagram showing NGS results and principal biological findings according to cytogenetic results (favorable, intermediate and unfavorable karyotype). In one case (indicated with the red color) cytogenetic analysis was not assessable.**

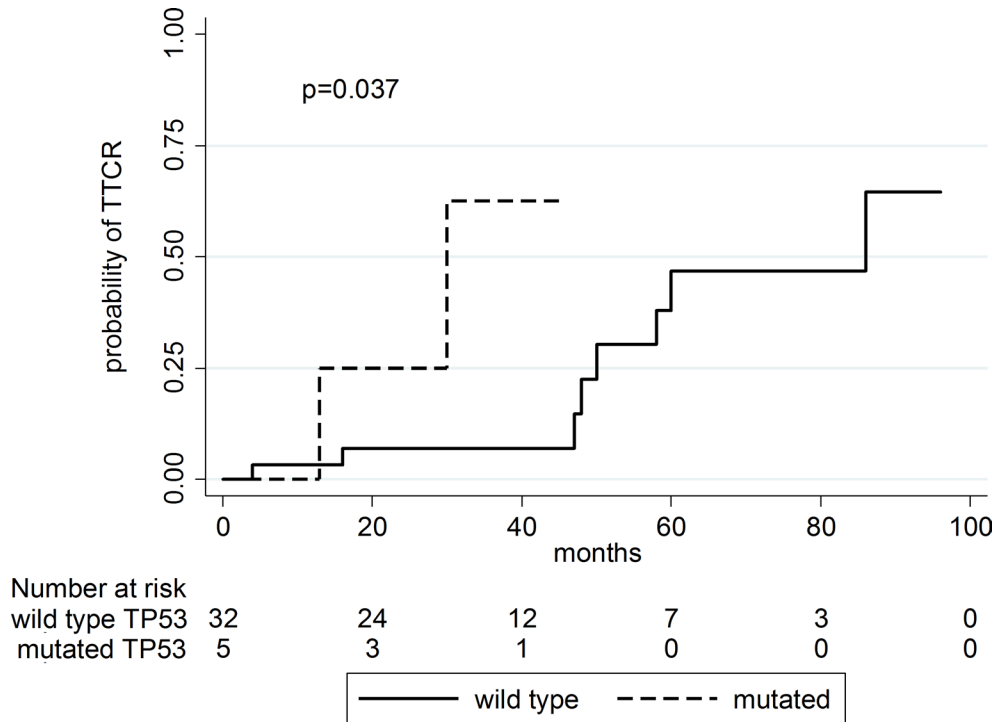

Supplementary Figure 2: TTCR according to *TP53* status in patients with favorable or intermediate karyotype.

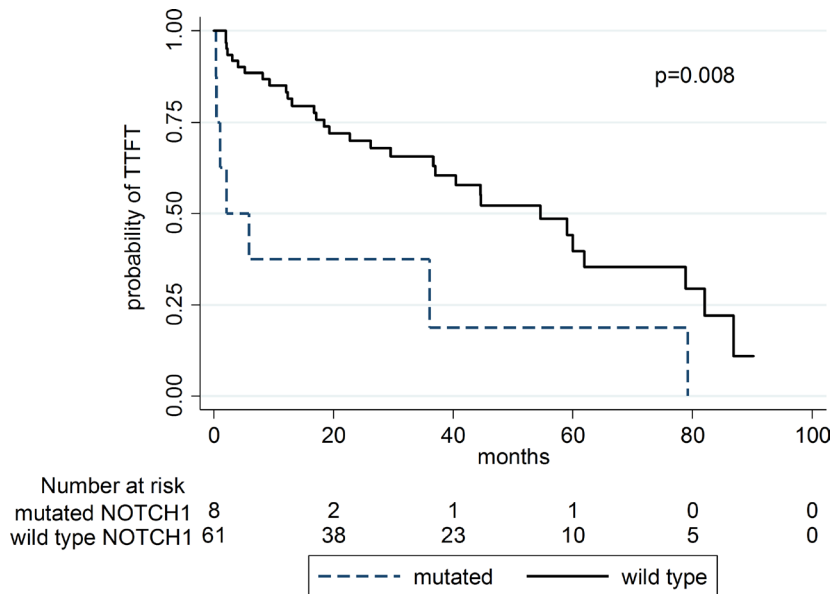

Supplementary Figure 3: TTFT according to *NOTCH1* status in patients without *TP53* disruption or complex karyotype.

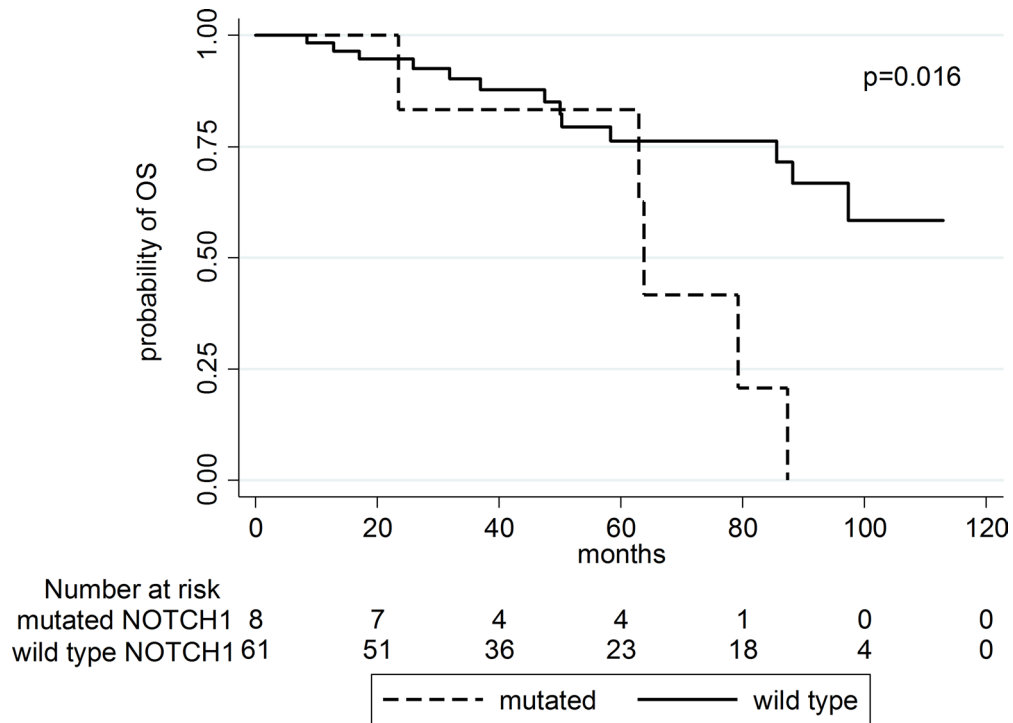

Supplementary Figure 4: OS according to *NOTCH1* status in patients without *TP53* disruption or complex karyotype.

Supplementary Table 1: List of karyotypes in the 101 high-risk CLL patients. See Supplementary Table\_1.

**Supplementary Table 2: Overview of the mutations observed in the 20 genes and median coverage for each gene**

| Gene          | Total mutated cases | Median coverage |
|---------------|---------------------|-----------------|
| <i>TP53</i>   | 16                  | 871.8           |
| <i>NOTCH1</i> | 11                  | 708.4           |
| <i>SF3B1</i>  | 11                  | 719.4           |
| <i>ATM</i>    | 8                   | 566.4           |
| <i>BIRC3</i>  | 5                   | 466.2           |
| <i>PTEN</i>   | 5                   | 498.3           |
| <i>BRAF</i>   | 4                   | 495.0           |
| <i>MYD88</i>  | 4                   | 683.5           |
| <i>POT1</i>   | 4                   | 524.0           |
| <i>FBXW7</i>  | 3                   | 781.4           |
| <i>XPO1</i>   | 3                   | 545.3           |
| <i>ZMYM3</i>  | 3                   | 519.8           |
| <i>KRAS</i>   | 2                   | 664.6           |
| <i>NRAS</i>   | 2                   | 732.6           |
| <i>PIK3CA</i> | 2                   | 954.9           |
| <i>CDKN2A</i> | 1                   | 531.0           |
| <i>CHD2</i>   | 1                   | 653.6           |
| <i>DDX3X</i>  | 1                   | 712.0           |
| <i>KIT</i>    | 0                   | 650.0           |
| <i>KLHL6</i>  | 0                   | 1265.3          |

**Supplementary Table 3: List of gene mutations by NGS in the 56 mutated high-risk CLL patients.**  
See Supplementary\_Table\_3.

**Supplementary Table 4: Multivariate analysis for TTFT, OS and TTCR with complex karyotype instead of karyotype abnormalities**

| Variable    |                                  | After bootstrapping |              |          |              |          |
|-------------|----------------------------------|---------------------|--------------|----------|--------------|----------|
| TTFT        |                                  | HR                  | CI           | <i>p</i> | CI           | <i>p</i> |
|             | Binet stage b-c vs a             | 2.410               | 1.818–3.195  | < 0.001  | 1.845–3.147  | < 0.001  |
|             | Complex karyotype                | 2.934               | 1.625–5.298  | < 0.001  | 1.686–5.108  | < 0.001  |
| <b>OS</b>   |                                  |                     |              |          |              |          |
|             | Binet stage b-c vs a             | 1.451               | 1.006–2.094  | 0.046    | 0.916–2.300  | 0.113    |
|             | <i>TP53</i> disruption yes vs no | 2.825               | 1.296–6.258  | 0.009    | 1.148–6.951  | 0.035    |
|             | Complex karyotype                | 2.914               | 1.357–6.258  | 0.006    | 1.080–7.861  | 0.024    |
| <b>TTCR</b> |                                  |                     |              |          |              |          |
|             | <i>IGHV</i> unmut vs mut         | 0.632               | 0.121–3.297  | 0.586    | 0.174–2.300  | 0.971    |
|             | <i>TP53</i> disruption yes vs no | 4.771               | 1.729–13.163 | 0.003    | 1.157–19.360 | 0.029    |
|             | Complex karyotype                | 2.486               | 1.086–5.685  | 0.031    | 0.905–6.825  | 0.077    |

The following variables were included in multivariate analysis:

TTFT: Binet stage and complex karyotype.

OS: Binet stage, *TP53* disruption and complex karyotype.

TTCR: *IGHV*, *TP53* disruption and complex karyotype.

**Supplementary Table 5: Prognostic impact of mutations in patients with favorable or intermediate karyotype**

| Variable                          | <i>N pts*</i>                      | TTFT                     |          |          | OS                       |          |          | TTCR                     |          |          |
|-----------------------------------|------------------------------------|--------------------------|----------|----------|--------------------------|----------|----------|--------------------------|----------|----------|
|                                   |                                    | HR<br>(CI 95%)           | <i>P</i> | <i>p</i> | HR<br>(CI 95%)           | <i>P</i> | <i>p</i> | HR<br>(CI 95%)           | <i>P</i> | <i>p</i> |
| Mutations by NGS yes/no           | 33 vs 33<br>[21 vs 16]             | 1.384<br>(0.717–2.675)   | 0.333    | -        | 1.375<br>(0.540–3.496)   | 0.504    | -        | 1.169<br>(0.327–4.170)   | 0.810    | --       |
| Number of mutations >=2 vs 1 vs 0 | 17 vs 16 vs 33<br>[11 vs 10 vs 16] | 1.344**<br>(0.609–2.967) | 0.463    | 0.618    | 1.339**<br>(0.436–4.116) | 0.609    | 0.796    | 0.778**<br>(0.142–4.280) | 0.773    | 0.693    |
|                                   |                                    | 1.427**<br>(0.646–3.151) | 0.379    |          | 1.411**<br>(0.458–4.345) | 0.548    |          | 1.557**<br>(0.387–6.271) | 0.553    |          |
| <i>TP53</i> mut vs wt             | 9 vs 57<br>[5 vs 32]               | 0.605<br>(0.210–1.743)   | 0.351    | -        | 1.170<br>(0.339–4.051)   | 0.805    | -        | 8.065<br>(1.133–57.394)  | 0.037    | -        |
| <i>SF3B1</i> mut vs wt            | 7 vs 59<br>[na]                    | 0.571<br>(0.374–3.050)   | 0.902    | -        | 0.981<br>(0.224–4.286)   | 0.979    | -        | Na                       |          | -        |
| <i>NOTCH1</i> mut vs wt           | 6 vs 60<br>[na]                    | 1.630<br>(0.571–4.657)   | 0.362    | -        | 0.682<br>(0.323–1.440)   | 0.316    | -        | Na                       |          | -        |

\*In squared brackets patients for TTCR analysis.

\*\*versus no mutation.

Legend: f, female; fav, favorable; HR: hazard ratio; int, intermediate; m, male; mut, mutated; na, not assessed; neg, negative; OS: overall survival; pos: positive; TTCR: time to chemorefractoriness; TTFT: time to first treatment; unfav, unfavorable; unmut, unmutated; yrs, years.

**Supplementary Table 6: Prognostic impact of mutations in patients without *TP53* disruption or complex karyotype**

| Variable                              | N pts*                            | TTFT                     |       |       | OS                       |       |       | TTCR                     |       |       |
|---------------------------------------|-----------------------------------|--------------------------|-------|-------|--------------------------|-------|-------|--------------------------|-------|-------|
|                                       |                                   | HR<br>(CI 95%)           | P     | P     | HR<br>(CI 95%)           | P     | P     | HR<br>(CI 95%)           | P     | P     |
| Mutations by NGS<br>Yes vs no         | 30 vs 39<br>[20 vs 18]            | 1.887<br>(0.985–3.618)   | 0.056 | -     | 0.843<br>(0.699–4.503)   | 0.228 | -     | 1.732<br>(0.517–5.795)   | 0.373 | -     |
| pNumber of mutations<br>>=2 vs 1 vs 0 | 12 vs 18 vs 39<br>[9 vs 11 vs 18] | 1.619**<br>(0.754–3.475) | 0.216 | 0.092 | 1.831**<br>(0.632–5.308) | 0.265 | 0.469 | 0.580**<br>(0.144–2.330) | 0.443 | 0.666 |
|                                       |                                   | 2.362**<br>(1.047–5.329) | 0.038 |       | 1.039**<br>(0.509–5.638) | 0.390 |       | 1.009**<br>(0.251–4.058) | 0.990 |       |
| <i>SF3B1</i><br>mut vs wt             | 5 vs 64<br>[na]                   | 0.999<br>(0.304–3.277)   | 0.998 | -     | 0.632<br>(0.084–4.761)   | 0.656 | -     | Na                       |       | -     |
| <i>NOTCH1</i><br>mut vs wt            | 8 vs 61<br>[7 vs 31]              | 3.113<br>(1.352–7.169)   | 0.008 | -     | 3.722<br>(1.284–10.798)  | 0.016 | -     | 0.581<br>(0.152–2.227)   | 0.429 | -     |

\*In squared brackets patients for TTCR analysis.

\*\*versus no mutation.

Legend: f, female; fav, favorable; HR: hazard ratio; int, intermediate; m, male; mut, mutated; na; not assessed; neg, negative; OS: overall survival; pos: positive; TTCR: time to chemorefractoriness; TTFT: time to first treatment; unfav, unfavorable; unmut, unmutated; yrs, years.
